# Supplementary material
Source: Springer Nature journal article supplement (https://www.springermedizin.de/resource/supplementary/12936_2003_46_MOESM4_ESM.pdf/9546746)

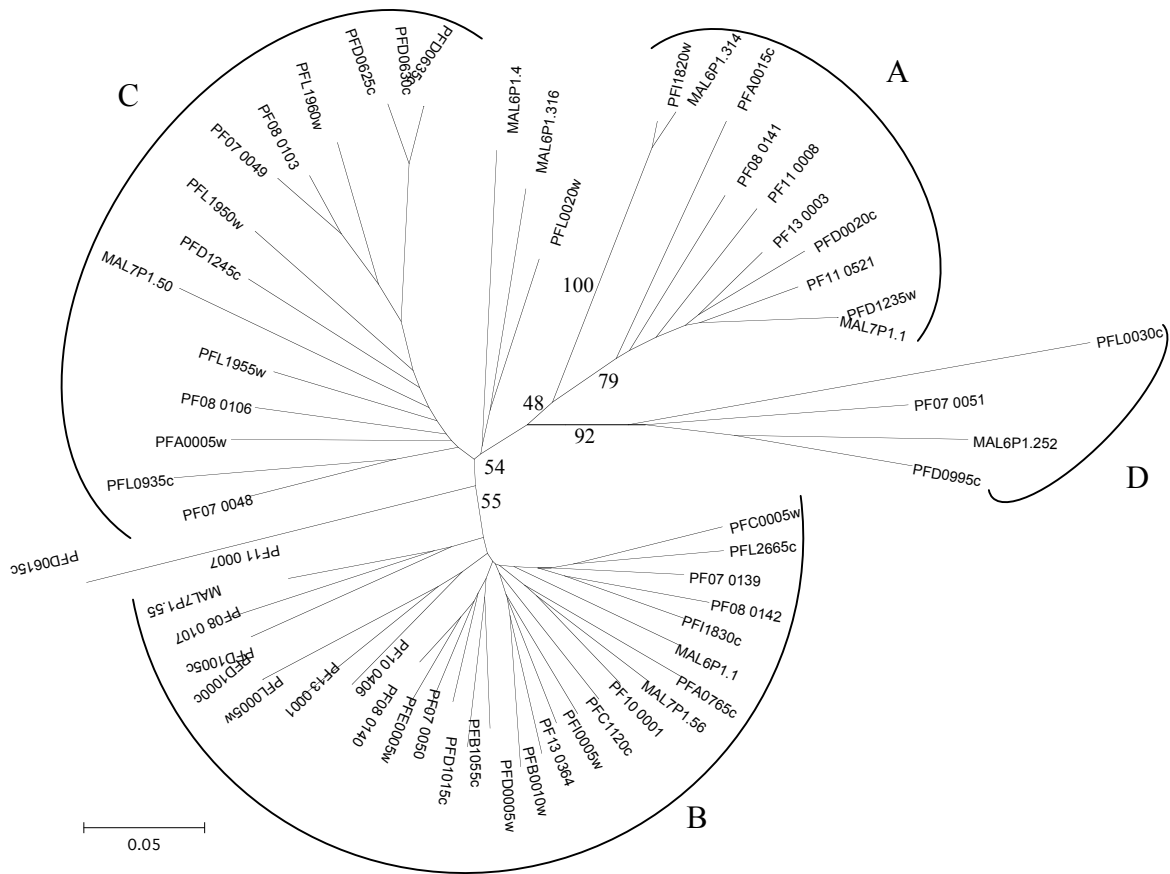

Supplement: MOESM4 [file 9546746]
